# Supplementary material for: Pathological correlates of impaired self-awareness of memory function in Alzheimer’s disease
Source: PubMed Central journal article supplement (PMC8234669; doi:10.1186/s13195-021-00856-x), 2021-06-25
Supplement: 13195_2021_856_MOESM1_ESM.pdf [file 13195_2021_856_MOESM1_ESM.pdf]

Pathological correlates of impaired self-awareness of memory  
function in Alzheimer's disease.

Supplementary Materials

Gagliardi, G., Kuppe, M., Lois, C., Hanseeuw, B., Vannini, P.,  
for the Alzheimer's Disease Neuroimaging Initiative

Alzheimer's Research and Therapy

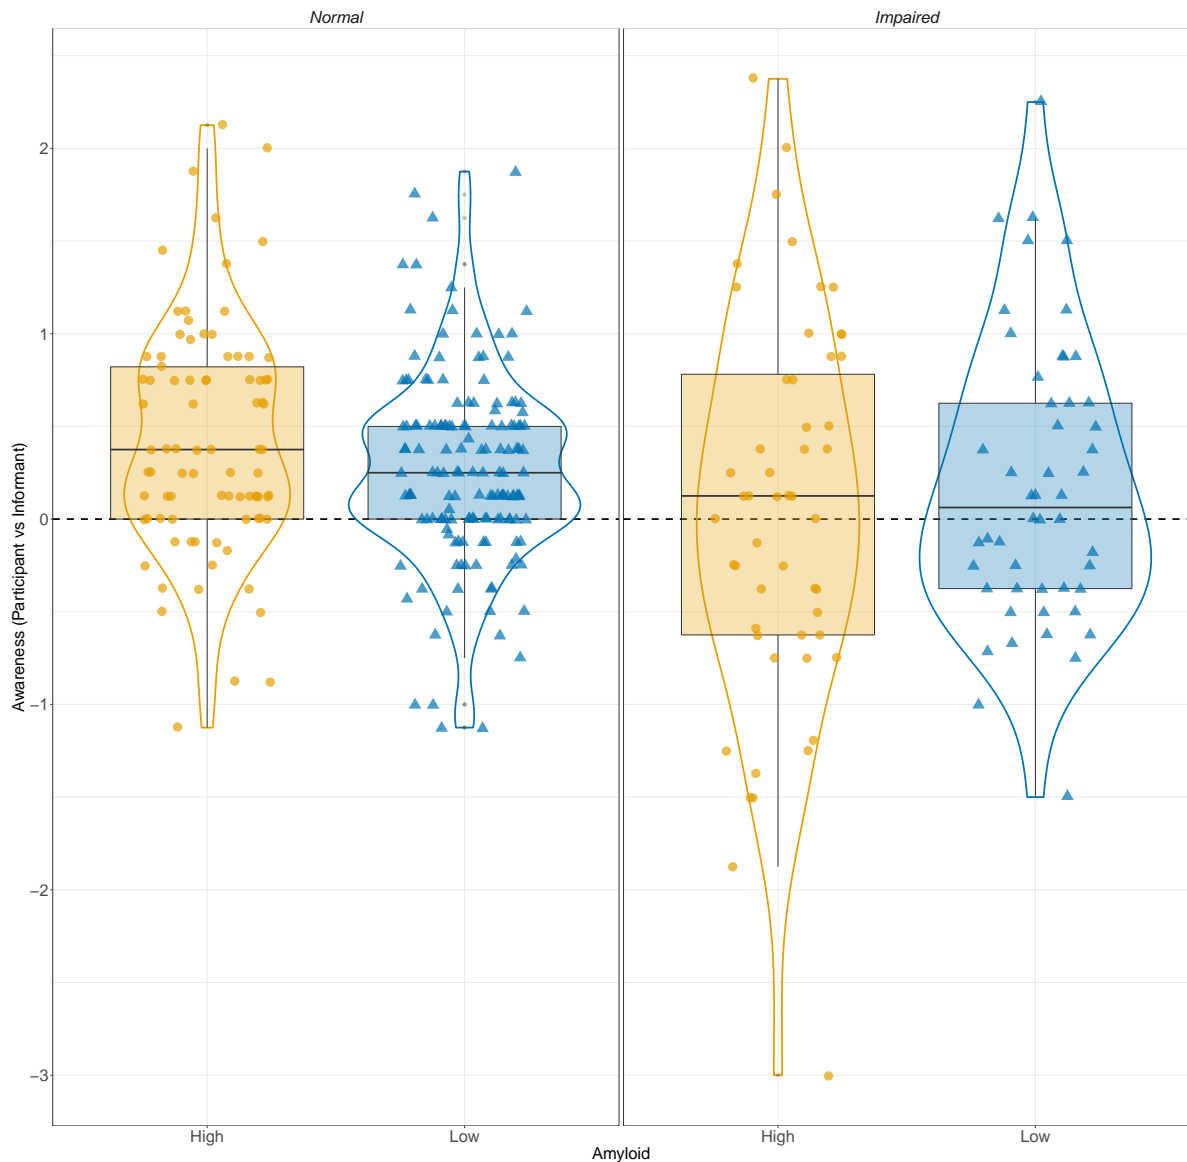

Boxplot of awareness (participant-informant index) in cognitively normal (left) and impaired (right) individuals.

Figure 1: Participant-Informant Awareness Index distributions across clinical groups

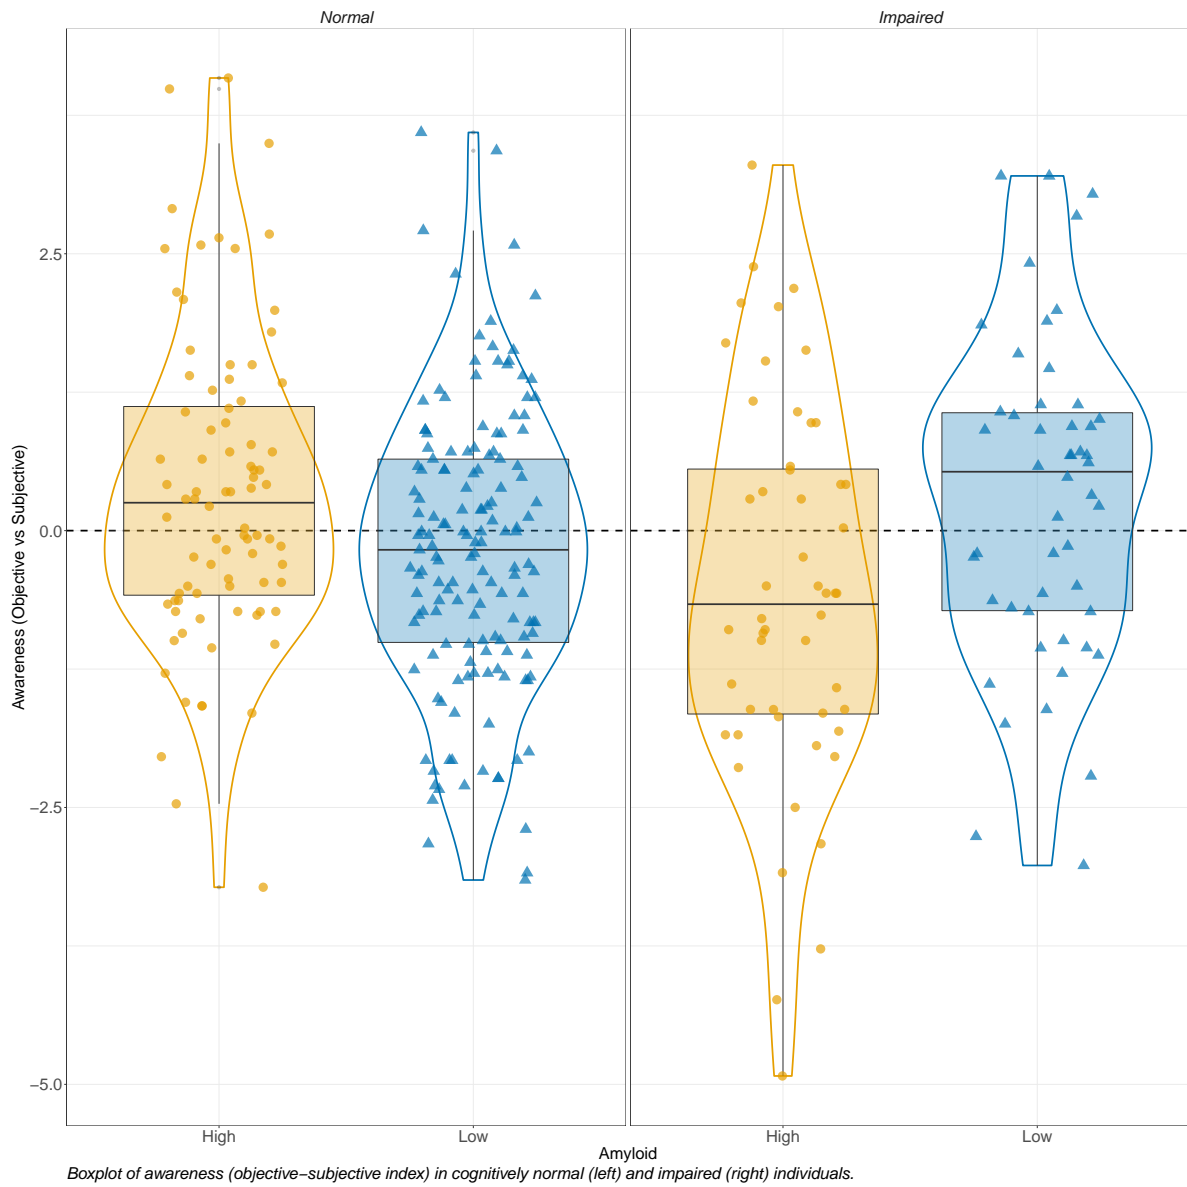

Figure 2: Objective-Subjective Awareness Index distributions across clinical groups

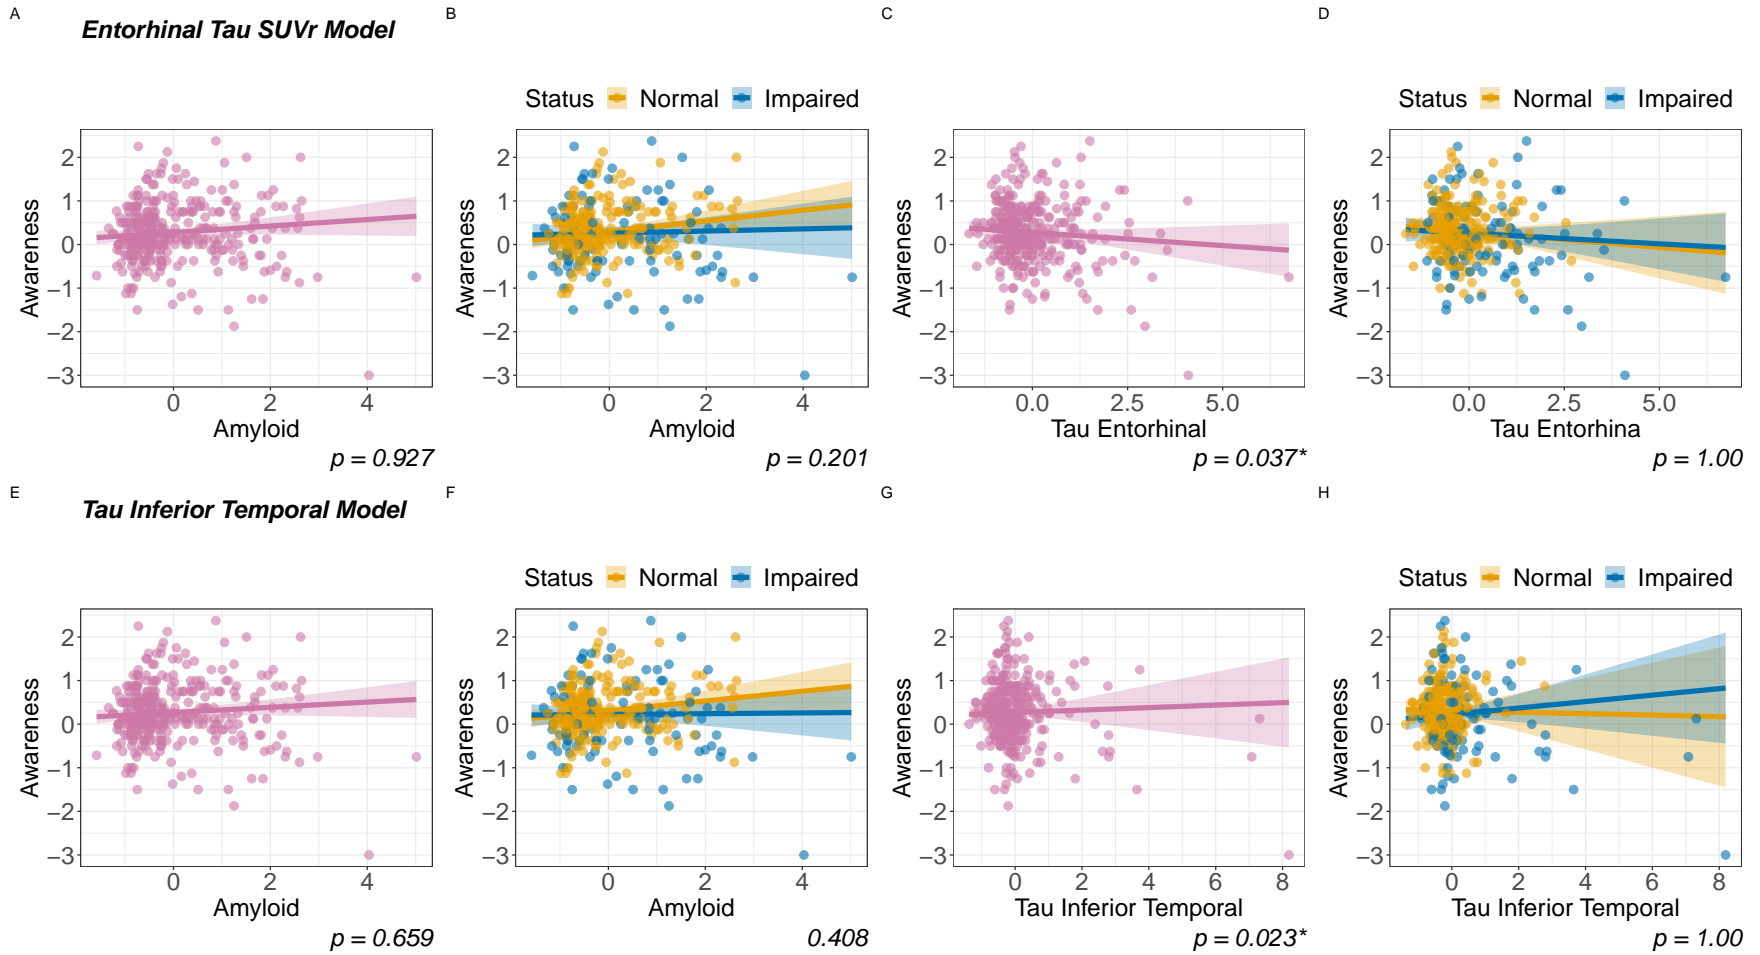

These figures shows the scatterplots, as well as the linear predictions from the models performed using both Entorhinal (upper line) and Inferior Temporal (lower line) SUVR values. The  $p$ -values associated to the presented main effects are also given below each figure.

Figure 3: Self-Informant Awareness Index and AD Biomarkers (One- and Two-way effects)

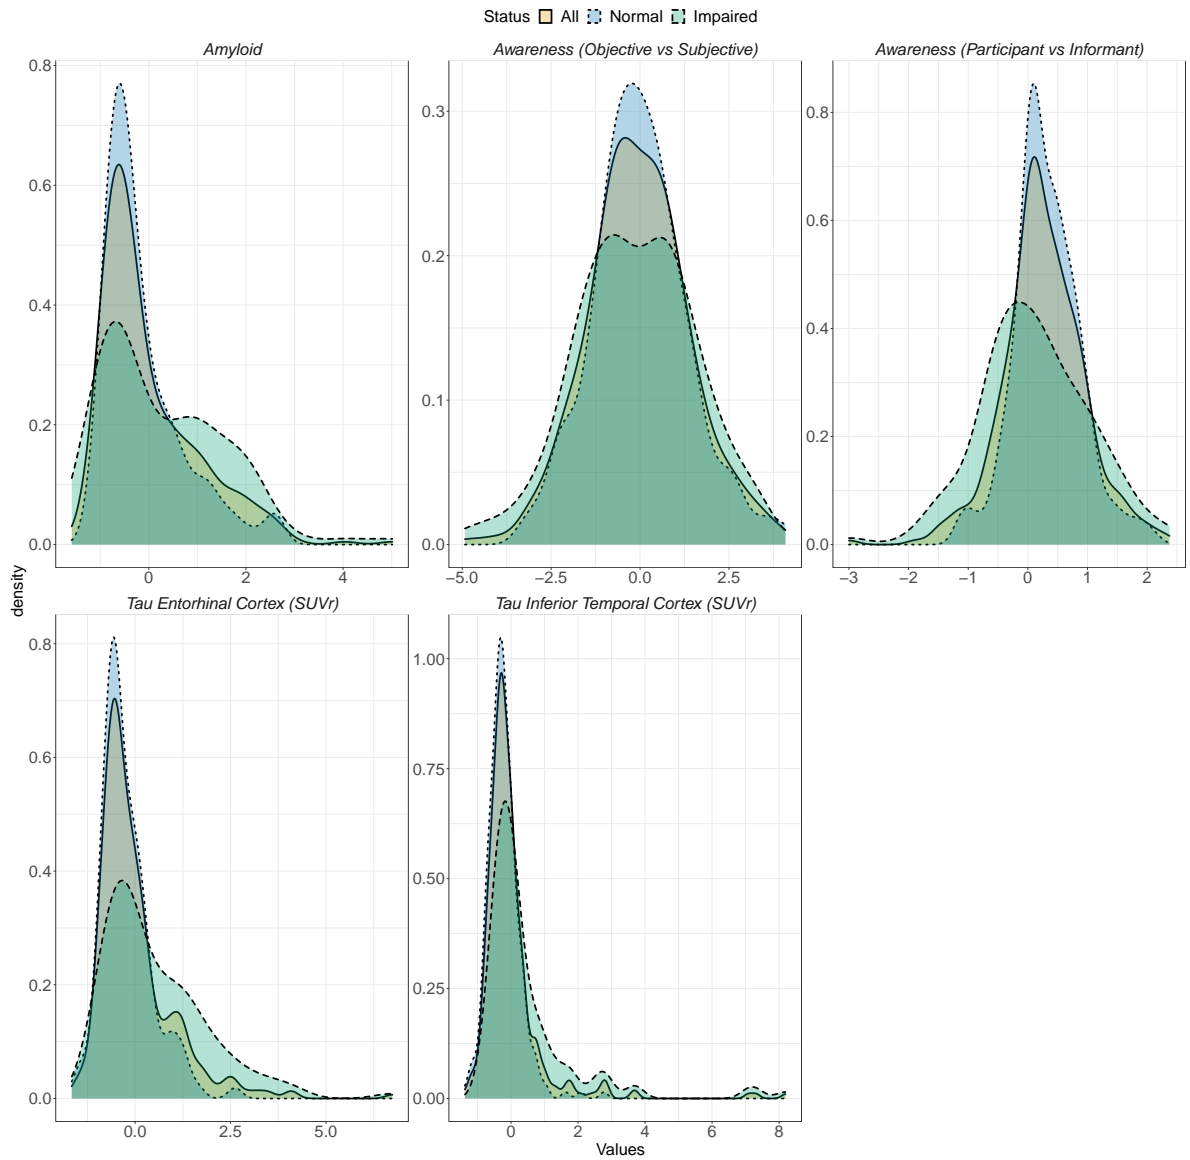

Density plots of awareness (objective–subjective and self–informant indexes) and AD biomarkers (amyloid and tau PET SUVR) in cognitively normal (blue) an

Figure 4: Awareness indexes and AD biomarkers distributions across clinical groups

Table 1: Supplementary Models: Relationship between Awareness, Education and AD Biomarkers

| Vars                                | Participants - Informants |      |        |        |                            |      |       |        | Objective - Subjective |      |       |        |                            |      |       |        |
|-------------------------------------|---------------------------|------|--------|--------|----------------------------|------|-------|--------|------------------------|------|-------|--------|----------------------------|------|-------|--------|
|                                     | SUVr Tau Entorhinal       |      |        |        | SUVr Tau Inferior Temporal |      |       |        | SUVr Tau Entorhinal    |      |       |        | SUVr Tau Inferior Temporal |      |       |        |
|                                     | Estimate                  | SD   | ESs    | P      | Estimate                   | SD   | ESs   | P      | Estimate               | SD   | ESs   | P      | Estimate                   | SD   | ESs   | P      |
| (Intercept)                         | 0.24                      | 0.5  |        |        | 0.18                       | 0.5  |       |        | 0.38                   | 1.05 |       |        | 0.1                        | 1.08 |       |        |
| Age                                 | 0                         | 0.01 | -0.001 | 1.000  | 0                          | 0.01 | 0.001 | 1.000  | -0.02                  | 0.01 | 0.011 | 0.087  | -0.02                      | 0.01 | 0.009 | 0.111  |
| Gender                              | -0.14                     | 0.08 | 0.01   | 0.134  | -0.14                      | 0.08 | 0.01  | 0.144  | -0.28                  | 0.16 | 0.009 | 0.169  | -0.29                      | 0.17 | 0.01  | 0.153  |
| Education                           | 0.01                      | 0.02 | 0      | 1.000  | 0.02                       | 0.02 | 0     | 1.000  | 0.09                   | 0.04 | 0     | 0.058  | 0.1                        | 0.04 | 0     | 0.099  |
| Clinical Status                     |                           |      | 0.001  | 0.779  |                            |      | 0.004 | 0.264  |                        |      | 0.002 | 0.677  |                            |      | 0.005 | 1.000  |
| Clinical StatusImpaired             | 0.29                      | 0.51 |        |        | 0.58                       | 0.51 |       |        | 0.95                   | 1.08 |       |        | 1.41                       | 1.09 |       |        |
| Amyloid                             | 0.01                      | 0.26 | 0      | 1.000  | 0.33                       | 0.27 | 0.005 | 0.486  | -0.47                  | 0.54 | 0.002 | 0.559  | -0.12                      | 0.57 | 0     | 0.456  |
| Tau                                 | -0.61                     | 0.27 | 0.016  | 0.030* | -1.17                      | 0.4  | 0.026 | 0.037* | -0.29                  | 0.57 | 0.001 | 0.057  | -1.51                      | 0.85 | 0.01  | 0.391  |
| Education:Clinical Status           |                           |      | 0.001  | 1.000  |                            |      | 0.005 | 0.369  |                        |      | 0.001 | 1.000  |                            |      | 0.004 | 0.471  |
| Education:Clinical StatusImpaired   | -0.02                     | 0.03 |        |        | -0.04                      | 0.03 |       |        | -0.04                  | 0.06 |       |        | -0.08                      | 0.06 |       |        |
| Education:Tau                       | 0.03                      | 0.02 | 0.013  | 0.083  | 0.07                       | 0.02 | 0.027 | 0.006* | 0.01                   | 0.03 | 0     | 1.000  | 0.07                       | 0.05 | 0.007 | 0.245  |
| Education:Amyloid                   | 0.01                      | 0.02 | 0.001  | 1.000  | -0.01                      | 0.02 | 0.002 | 0.866  | 0.05                   | 0.03 | 0.008 | 0.227  | 0.03                       | 0.03 | 0.003 | 0.734  |
| Clinical Status:Amyloid             |                           |      | 0.005  | 0.173  |                            |      | 0.008 | 0.166  |                        |      | 0.012 | 0.034* |                            |      | 0.035 | 0.002* |
| Clinical StatusImpaired:Amyloid     | -0.11                     | 0.09 |        |        | -0.14                      | 0.08 |       |        | -0.37                  | 0.19 |       |        | -0.61                      | 0.18 |       |        |
| Clinical Status:Tau                 |                           |      | 0.001  | 1.000  |                            |      | 0.004 | 1.000  |                        |      | 0.001 | 1.000  |                            |      | 0.005 | 0.531  |
| Clinical StatusImpaired:Tau         | 0.06                      | 0.09 |        |        | 0.14                       | 0.13 |       |        | 0.1                    | 0.19 |       |        | 0.34                       | 0.27 |       |        |
| Amyloid:Tau                         | 0.12                      | 0.07 | 0      | 0.120  | 0.12                       | 0.09 | 0     | 0.210  | 0.17                   | 0.15 | 0     | 0.164  | 0.11                       | 0.2  | 0     | 1.000  |
| Clinical Status:Amyloid:Tau         |                           |      | 0.024  | 0.012* |                            |      | 0.012 | 0.104  |                        |      | 0.014 | 0.065  |                            |      | 0.002 | 0.953  |
| Clinical StatusImpaired:Amyloid:Tau | -0.22                     | 0.08 |        |        | -0.19                      | 0.1  |       |        | -0.36                  | 0.17 |       |        | -0.15                      | 0.21 |       |        |

Note:

SD = Standard Deviation, ESs = Effect Sizes (Cohen's  $f^2$ ), Amyloid = florbetapir PET SUVr, Tau = flortaucipir PET SUVr

Table 2: Supplementary Models: Relationship between Awareness and AD Biomarkers for the whole sample

| Vars         | Participants - Informants |      |       |        |                            |      |       |         | Objective - Subjective |      |       |        |                            |      |       |        |
|--------------|---------------------------|------|-------|--------|----------------------------|------|-------|---------|------------------------|------|-------|--------|----------------------------|------|-------|--------|
|              | SUVr Tau Entorhinal       |      |       |        | SUVr Tau Inferior Temporal |      |       |         | SUVr Tau Entorhinal    |      |       |        | SUVr Tau Inferior Temporal |      |       |        |
|              | Estimate                  | SD   | ESs   | P      | Estimate                   | SD   | ESs   | P       | Estimate               | SD   | ESs   | P      | Estimate                   | SD   | ESs   | P      |
| (Intercept)  | 0.3                       | 0.46 |       |        | 0.55                       | 0.46 |       |         | 0.78                   | 0.96 |       |        | 0.98                       | 0.98 |       |        |
| Age          | 0                         | 0.01 | 0     | 1.000  | 0                          | 0.01 | 0.001 | 1.000   | -0.02                  | 0.01 | 0.009 | 0.157  | -0.02                      | 0.01 | 0.01  | 0.128  |
| Gender       | -0.15                     | 0.08 | 0.012 | 0.091  | -0.14                      | 0.08 | 0.011 | 0.113   | -0.25                  | 0.16 | 0.007 | 0.241  | -0.24                      | 0.16 | 0.007 | 0.288  |
| Education    | 0                         | 0.01 | 0     | 1.000  | 0                          | 0.01 | 0     | 1.000   | 0.06                   | 0.03 | 0.01  | 0.136  | 0.05                       | 0.03 | 0.007 | 0.249  |
| Amyloid      | 0.07                      | 0.04 | 0.008 | 1.000  | 0.06                       | 0.04 | 0.006 | 0.665   | 0.18                   | 0.09 | 0.013 | 0.668  | 0.12                       | 0.09 | 0.006 | 0.555  |
| Tau          | -0.09                     | 0.04 | 0.013 | 0.001* | 0.01                       | 0.06 | 0     | <0.001* | -0.12                  | 0.09 | 0.005 | 0.013* | -0.02                      | 0.13 | 0     | 0.019* |
| Amyloid: Tau | -0.09                     | 0.03 | 0.032 | 0.003* | -0.1                       | 0.02 | 0.048 | <0.001* | -0.2                   | 0.06 | 0.035 | 0.002* | -0.12                      | 0.05 | 0.016 | 0.046* |

*Note:*

SD = Standard Deviation, ESs = Effect Sizes (Cohen's  $f^2$ ), Amyloid = florbetapir PET SUVr, Tau = flortaucipir PET SUVr
